# Supplementary material for: Regional early and progressive loss of brain pericytes but not vascular smooth muscle cells in adult mice with disrupted platelet-derived growth factor receptor-β signaling
Source: PubMed Central journal article supplement (PMC5404855; doi:10.1371/journal.pone.0176225), 2017-04-25
Supplement: pone.0176225.s001.pdf [file pone.0176225.s001.pdf]

### S1 Fig

**Step 1.** Images are open in Image J. Example is taken from a control mouse. Bar = 40  $\mu\text{m}$ .

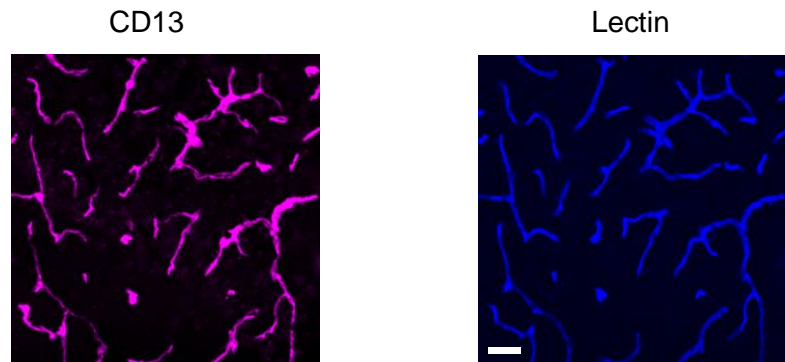

**Step 2.** Pseudo-colored 8-bit images for CD13 and lectin signals were thresholded using Otsu's thresholding method in ImageJ that minimizes the intra-class variance of the thresholded black and white pixels.

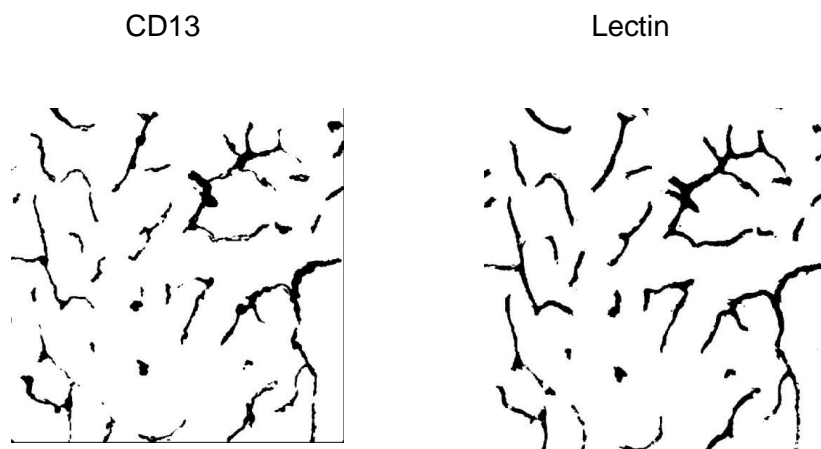

**Step 3.** The integrated density for each thresholded image was calculated and subsequently converted to a pixel-based area by dividing by 255. For 8-bit images 255 is the maximum pixel intensity. The ratio of CD13-positive area over lectin-positive area was then calculated as shown in Table below.

|        | Raw Integrated Signal Density | Area covered by fluorescent signals (pixel-based) | % CD13 signal /Lectin signal |
|--------|-------------------------------|---------------------------------------------------|------------------------------|
| CD13   | 7226029                       | $7226029 / 255 = 94457$                           | $94457 / 116500 = 81\%$      |
| Lectin | 8912302                       | $8912302 / 255 = 116500$                          |                              |
