# Supplementary material for: Regional early and progressive loss of brain pericytes but not vascular smooth muscle cells in adult mice with disrupted platelet-derived growth factor receptor-β signaling
Source: PubMed Central journal article supplement (PMC5404855; doi:10.1371/journal.pone.0176225), 2017-04-25

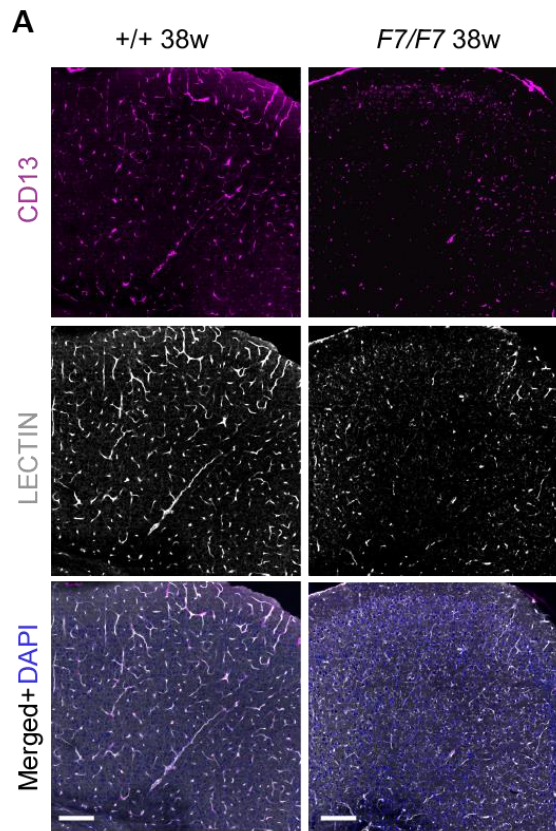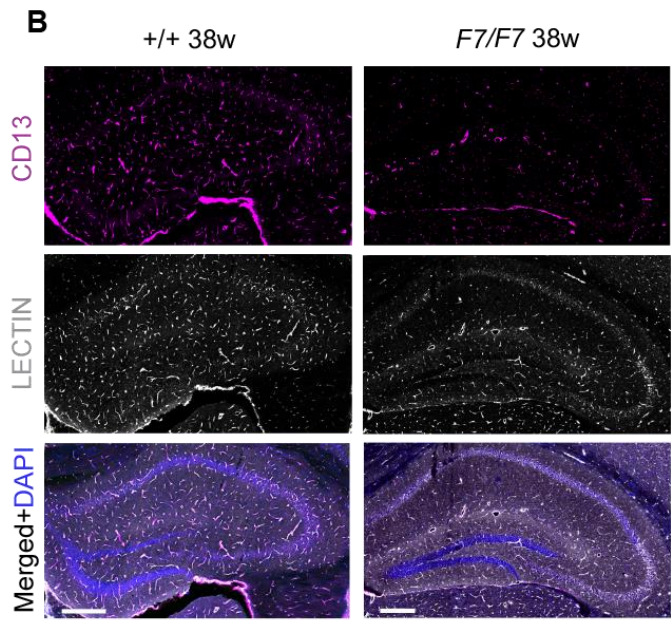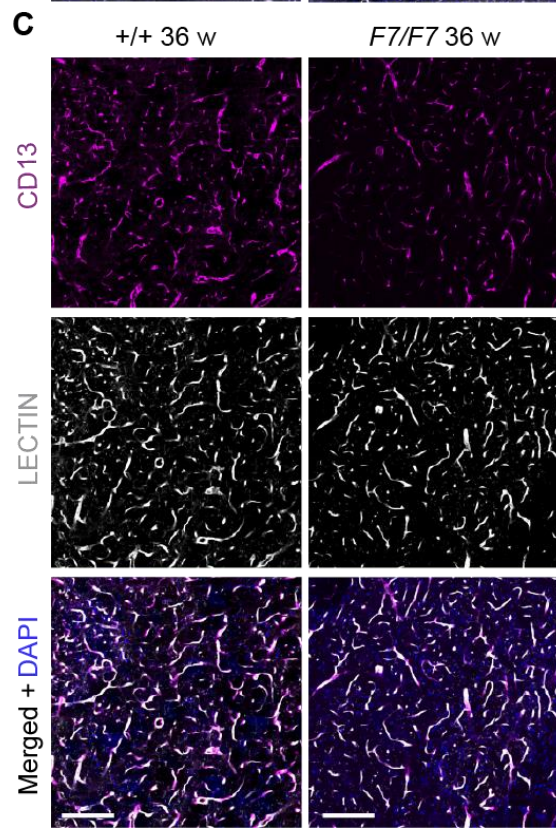

Supplement: pone.0176225.s002.pdf [file pone.0176225.s002.pdf]
